# Supplementary material for: Integration of Alzheimer’s disease genetics and myeloid genomics reveals novel disease risk mechanisms
Source: bioRxiv or medRxiv preprint supplement (doi:10.1101/694281), 2019-08-12

# Supplementary Figure 1

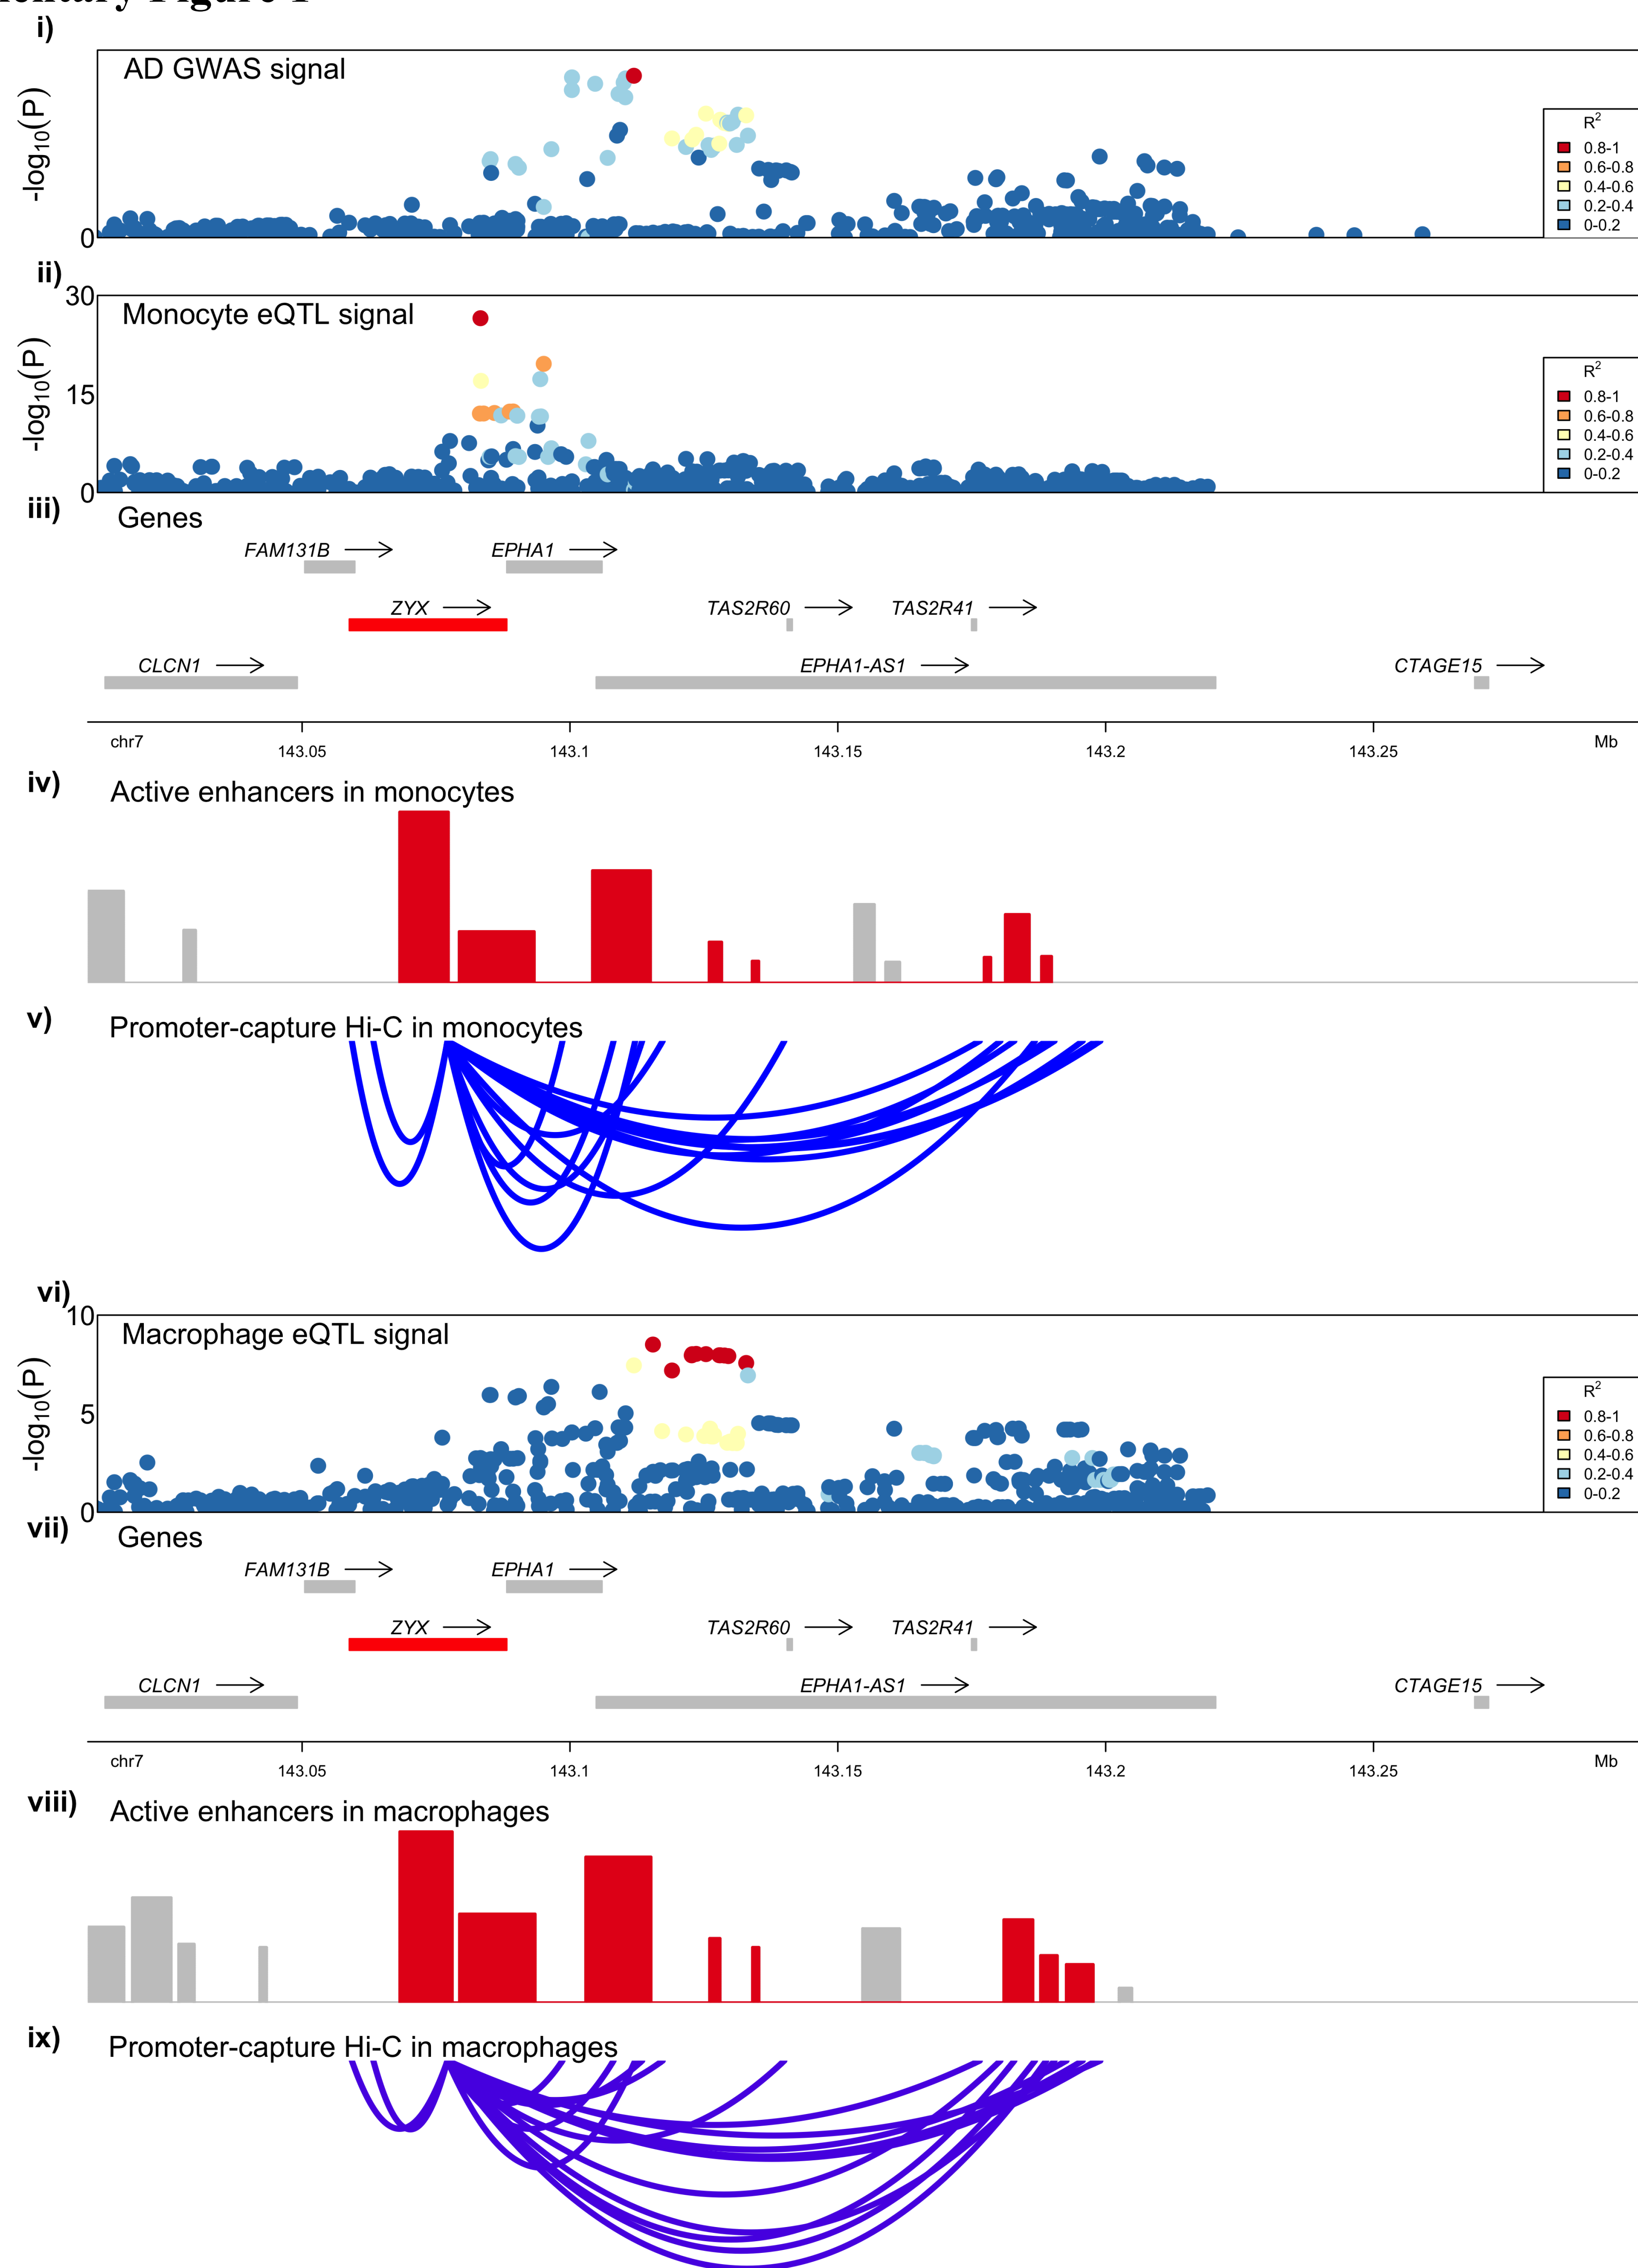

# Supplementary Figure 2

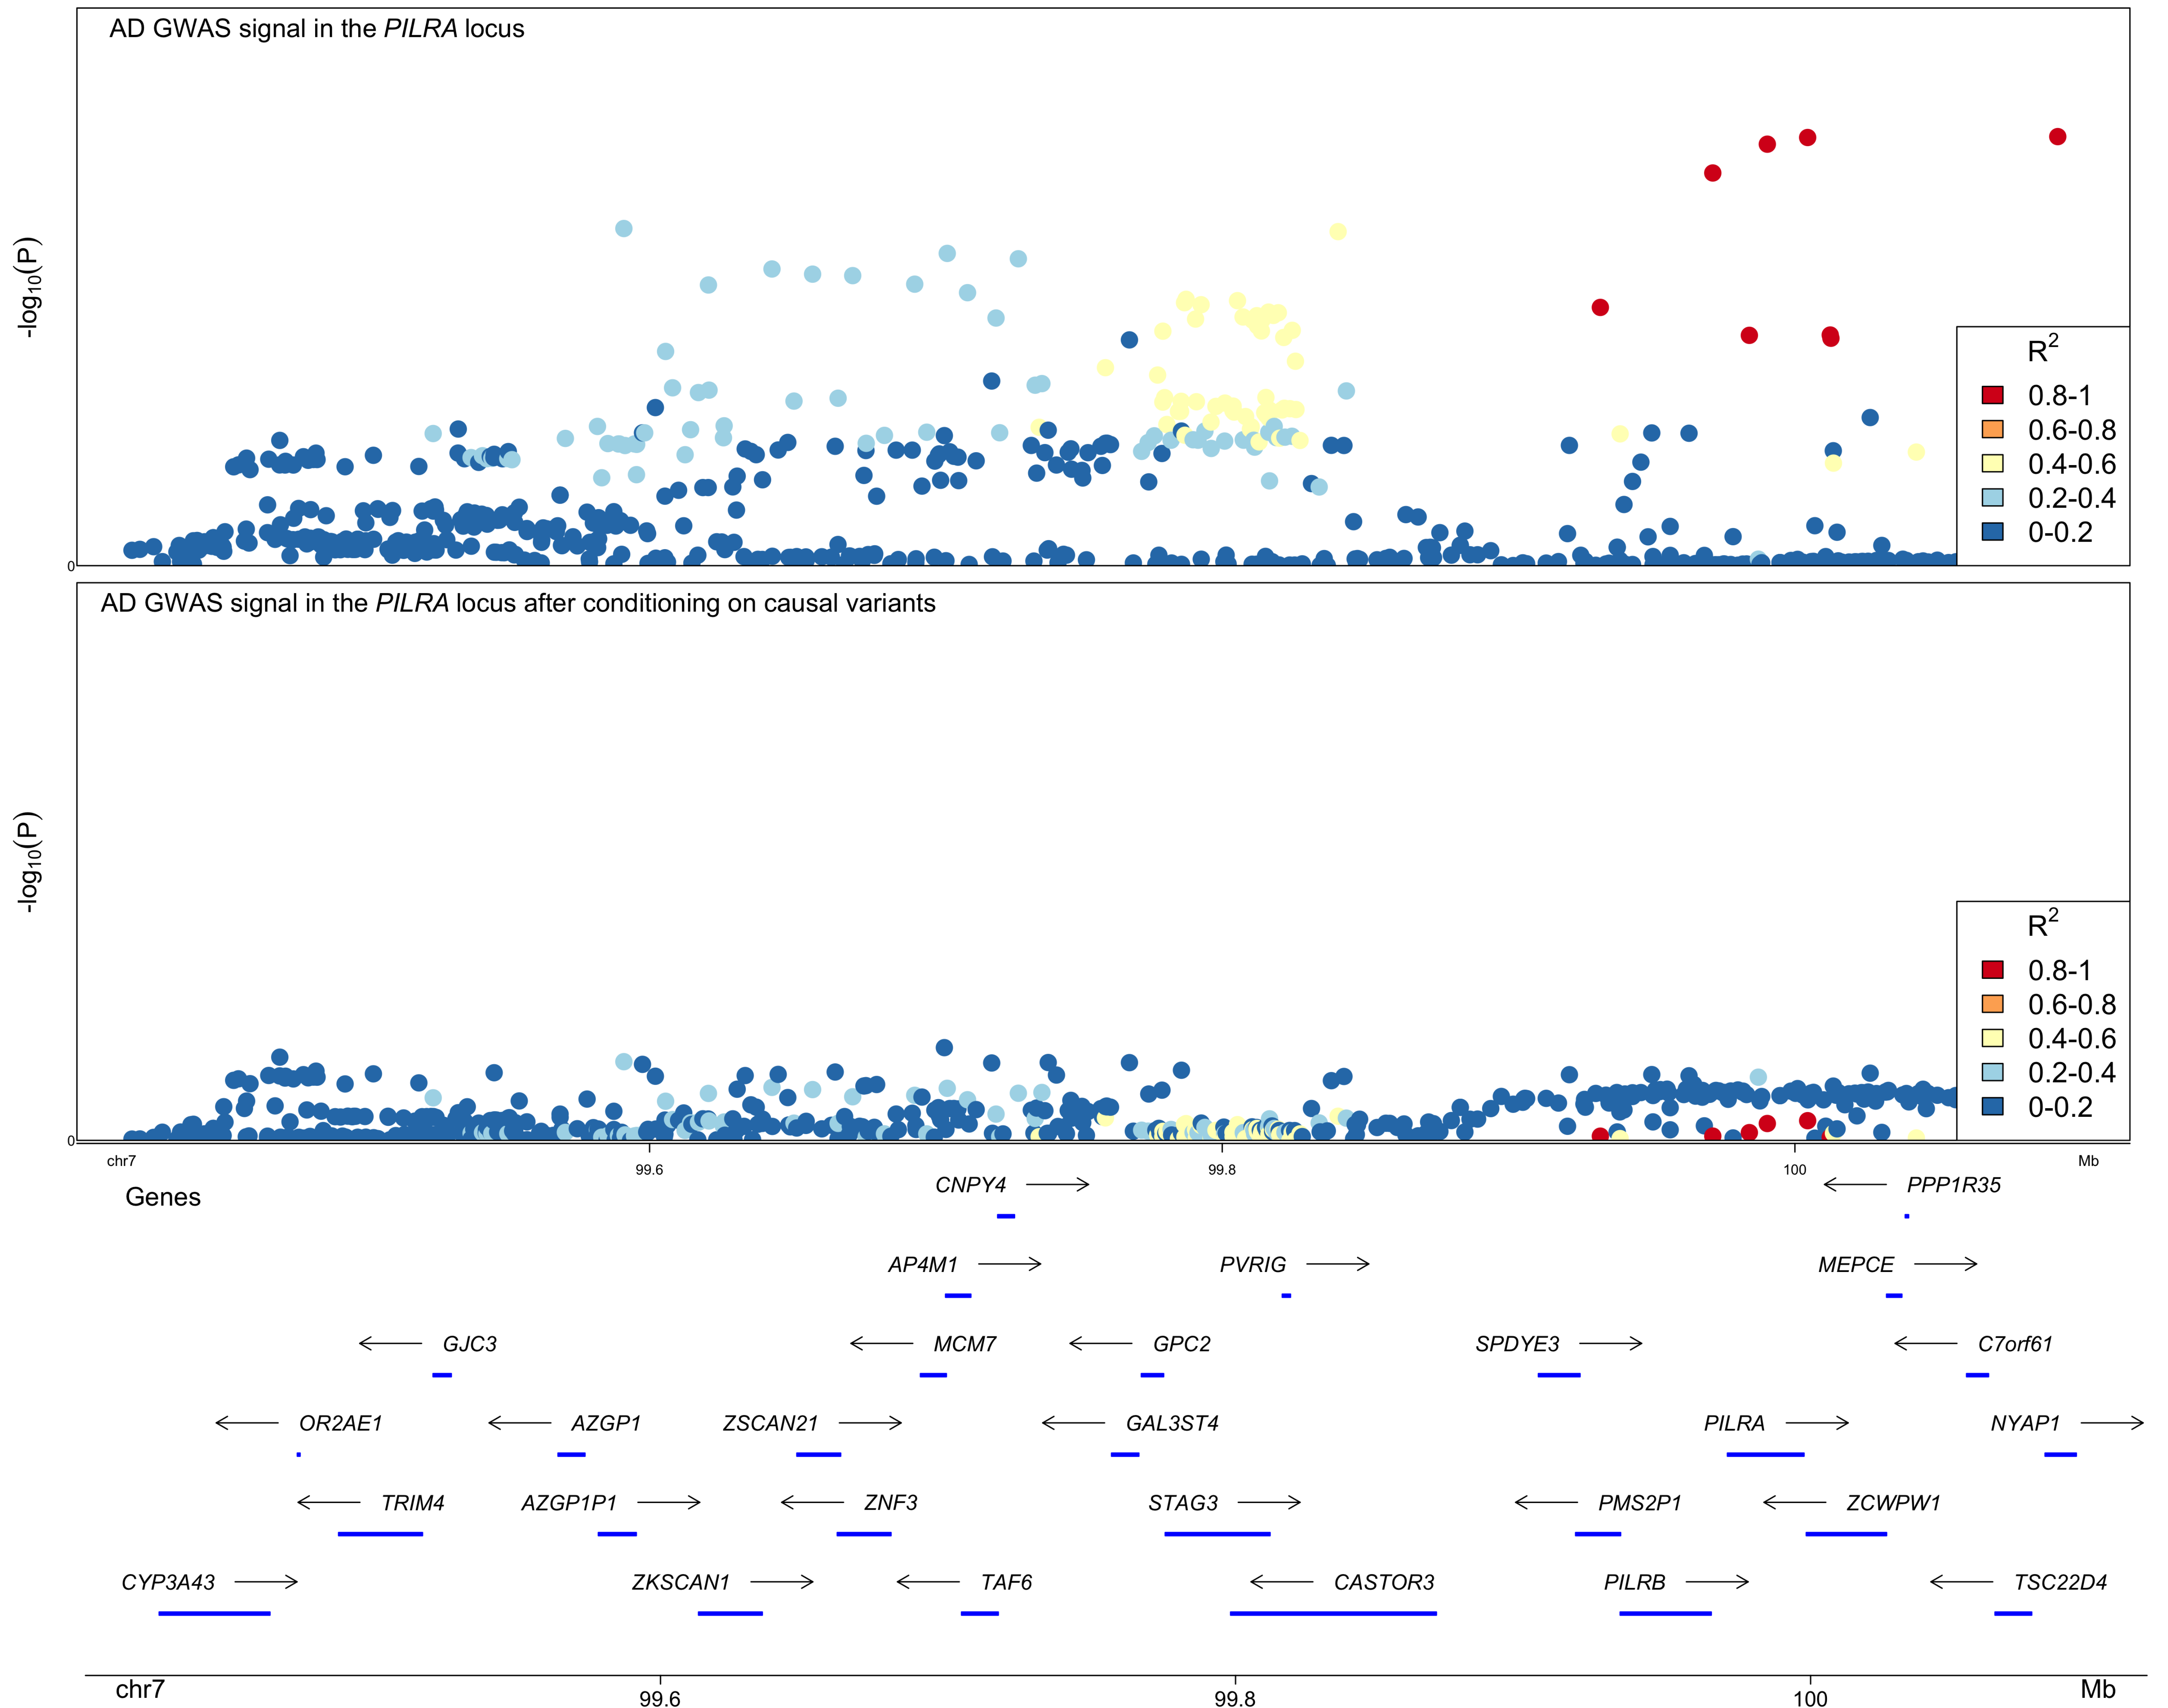

# Supplementary Figure 3

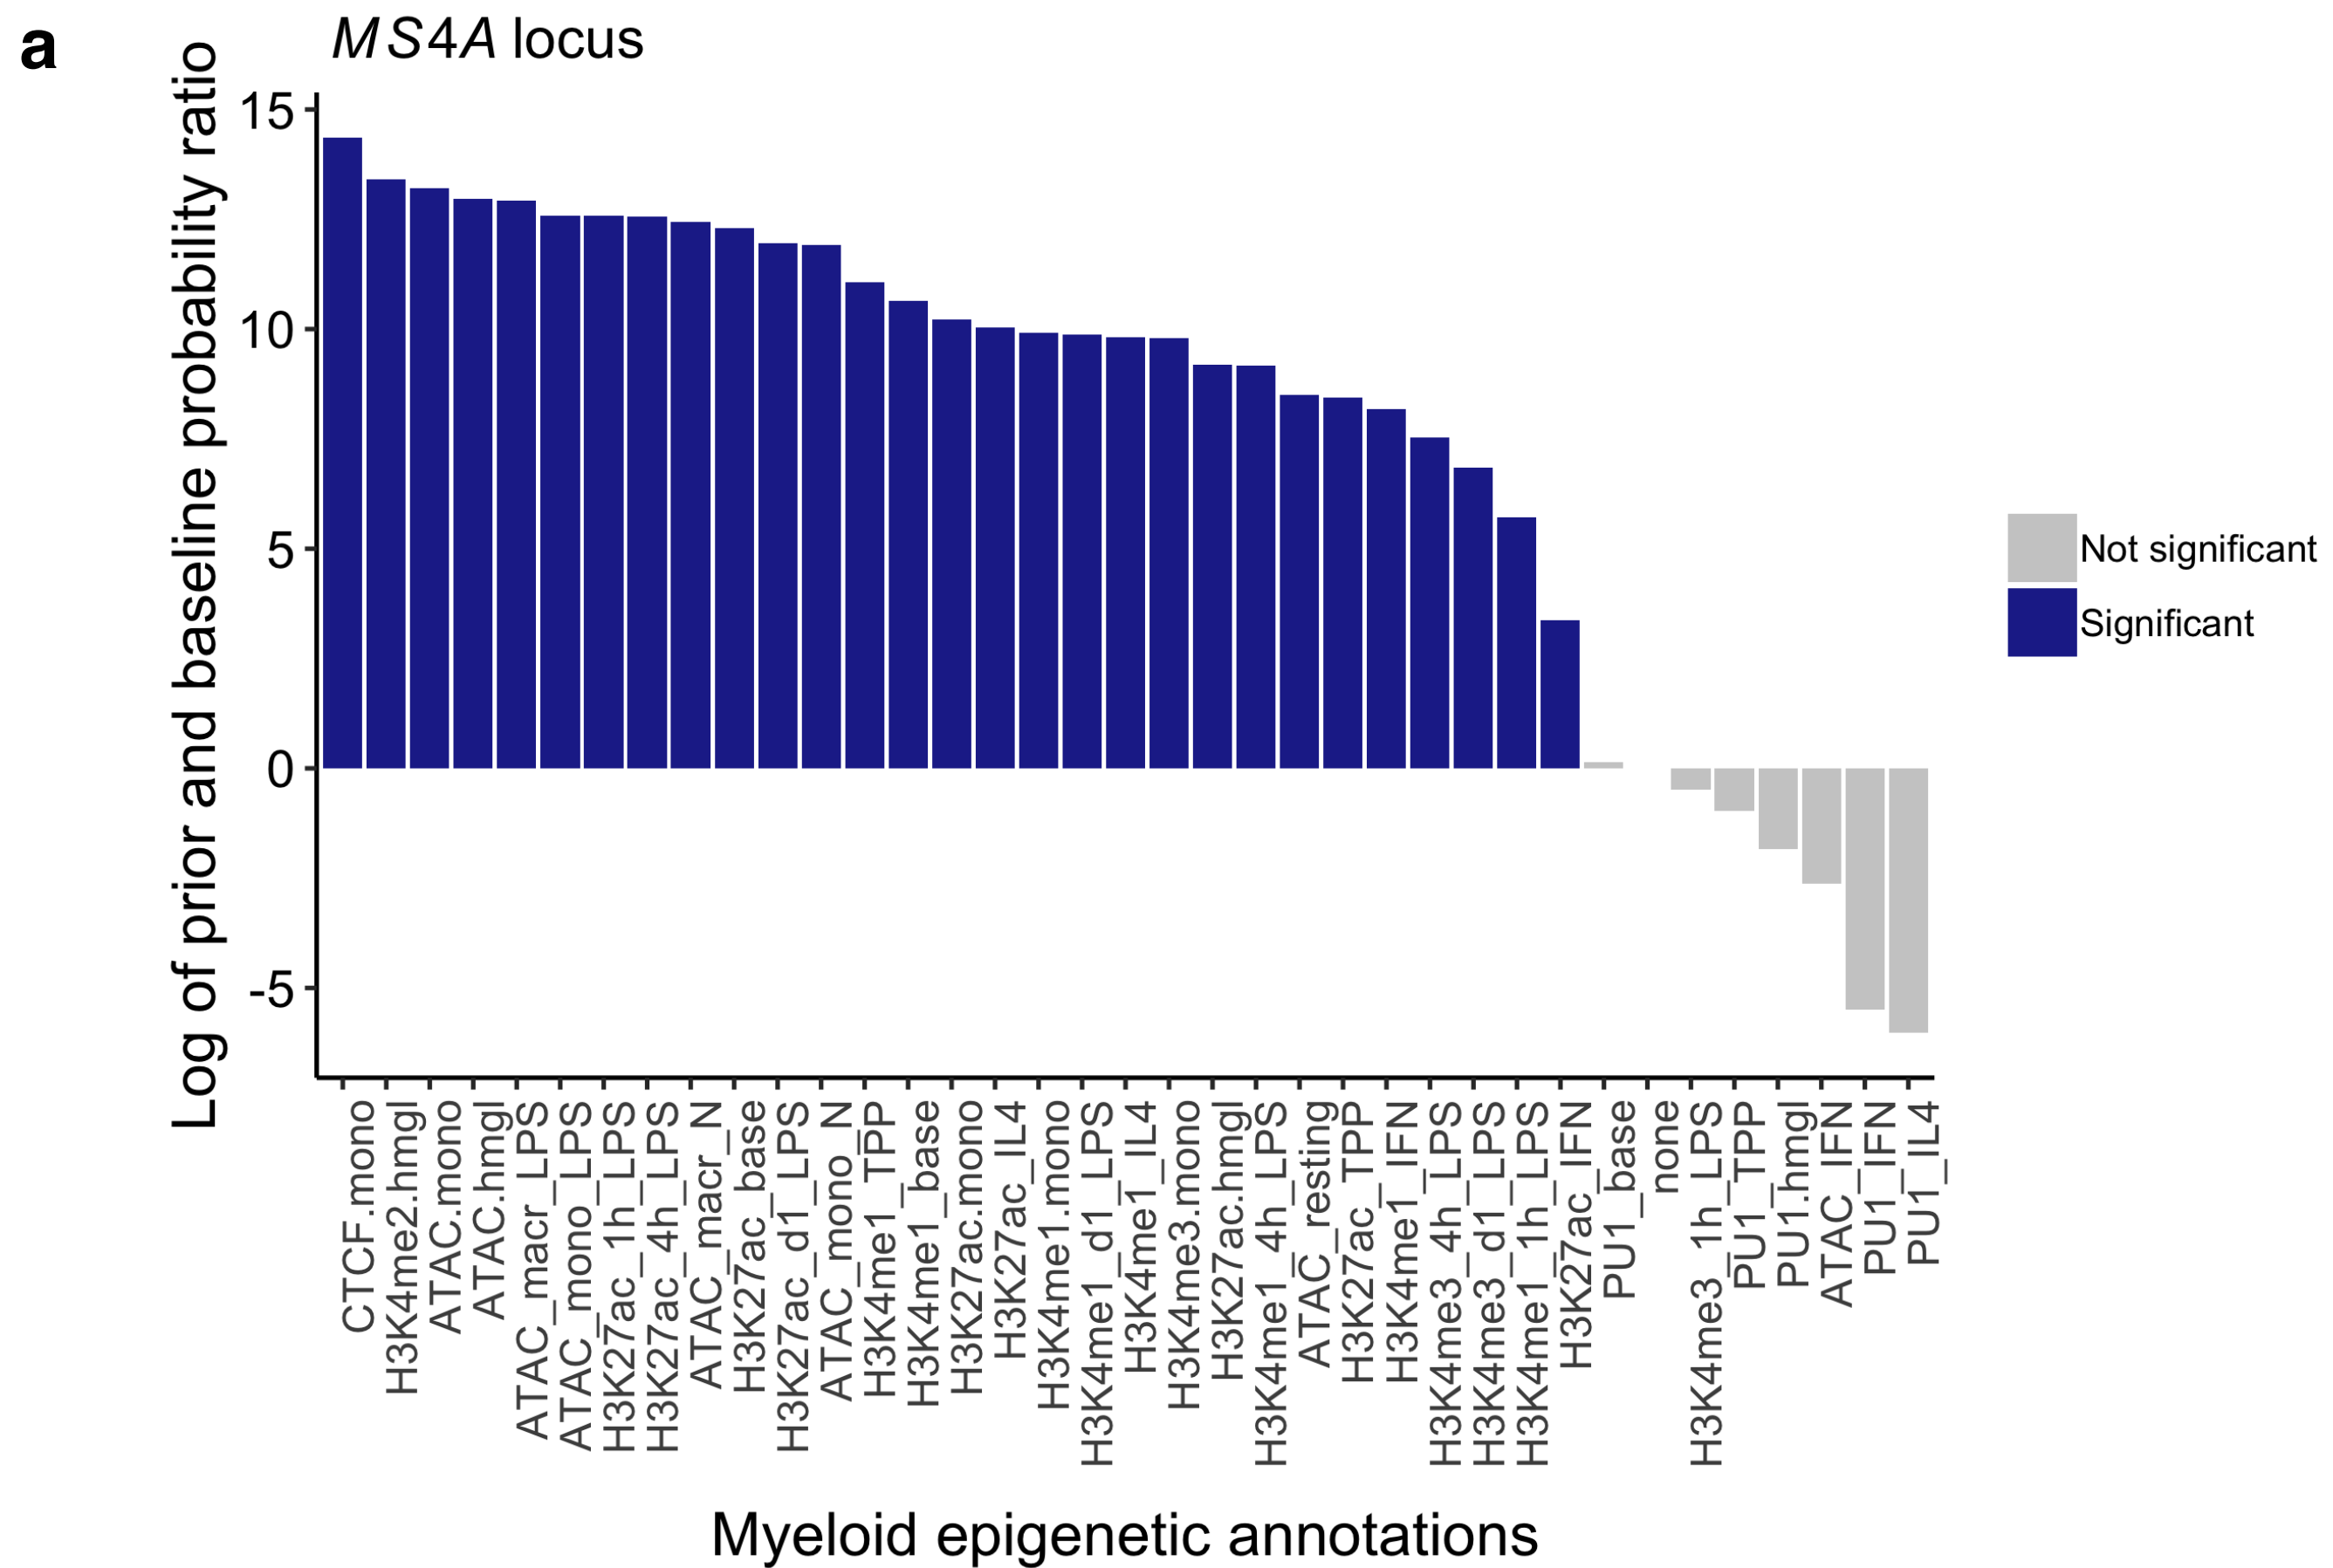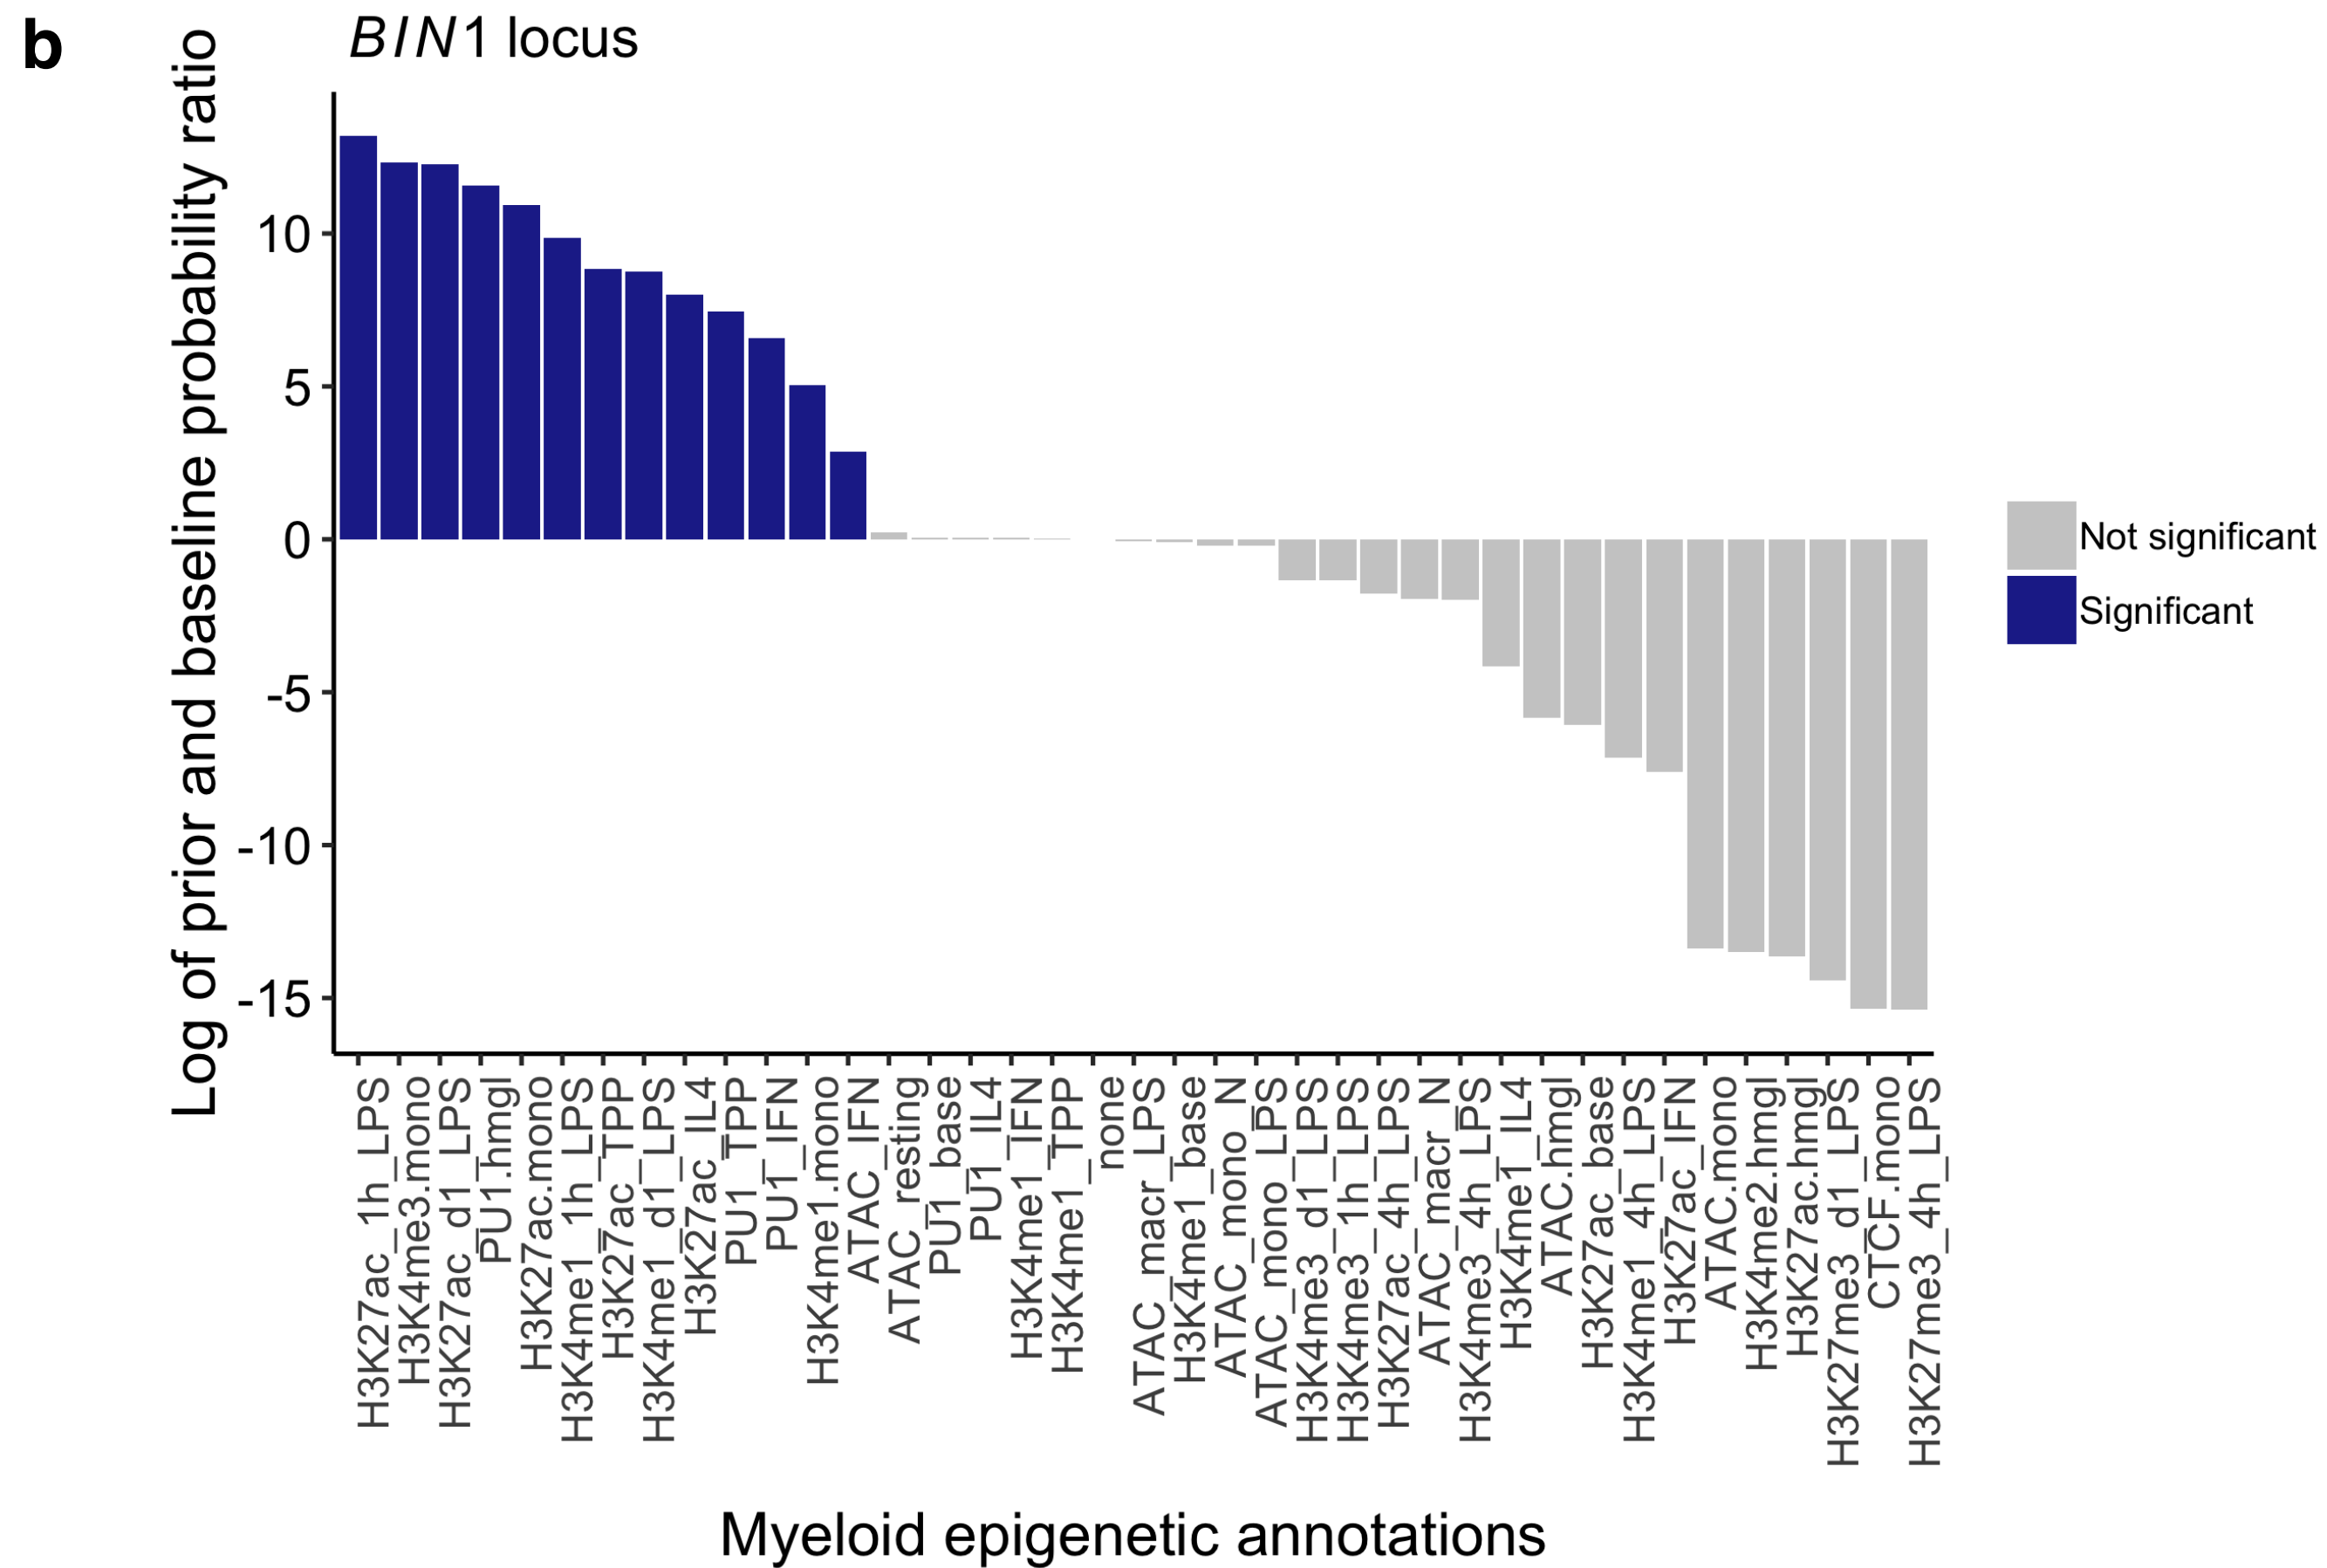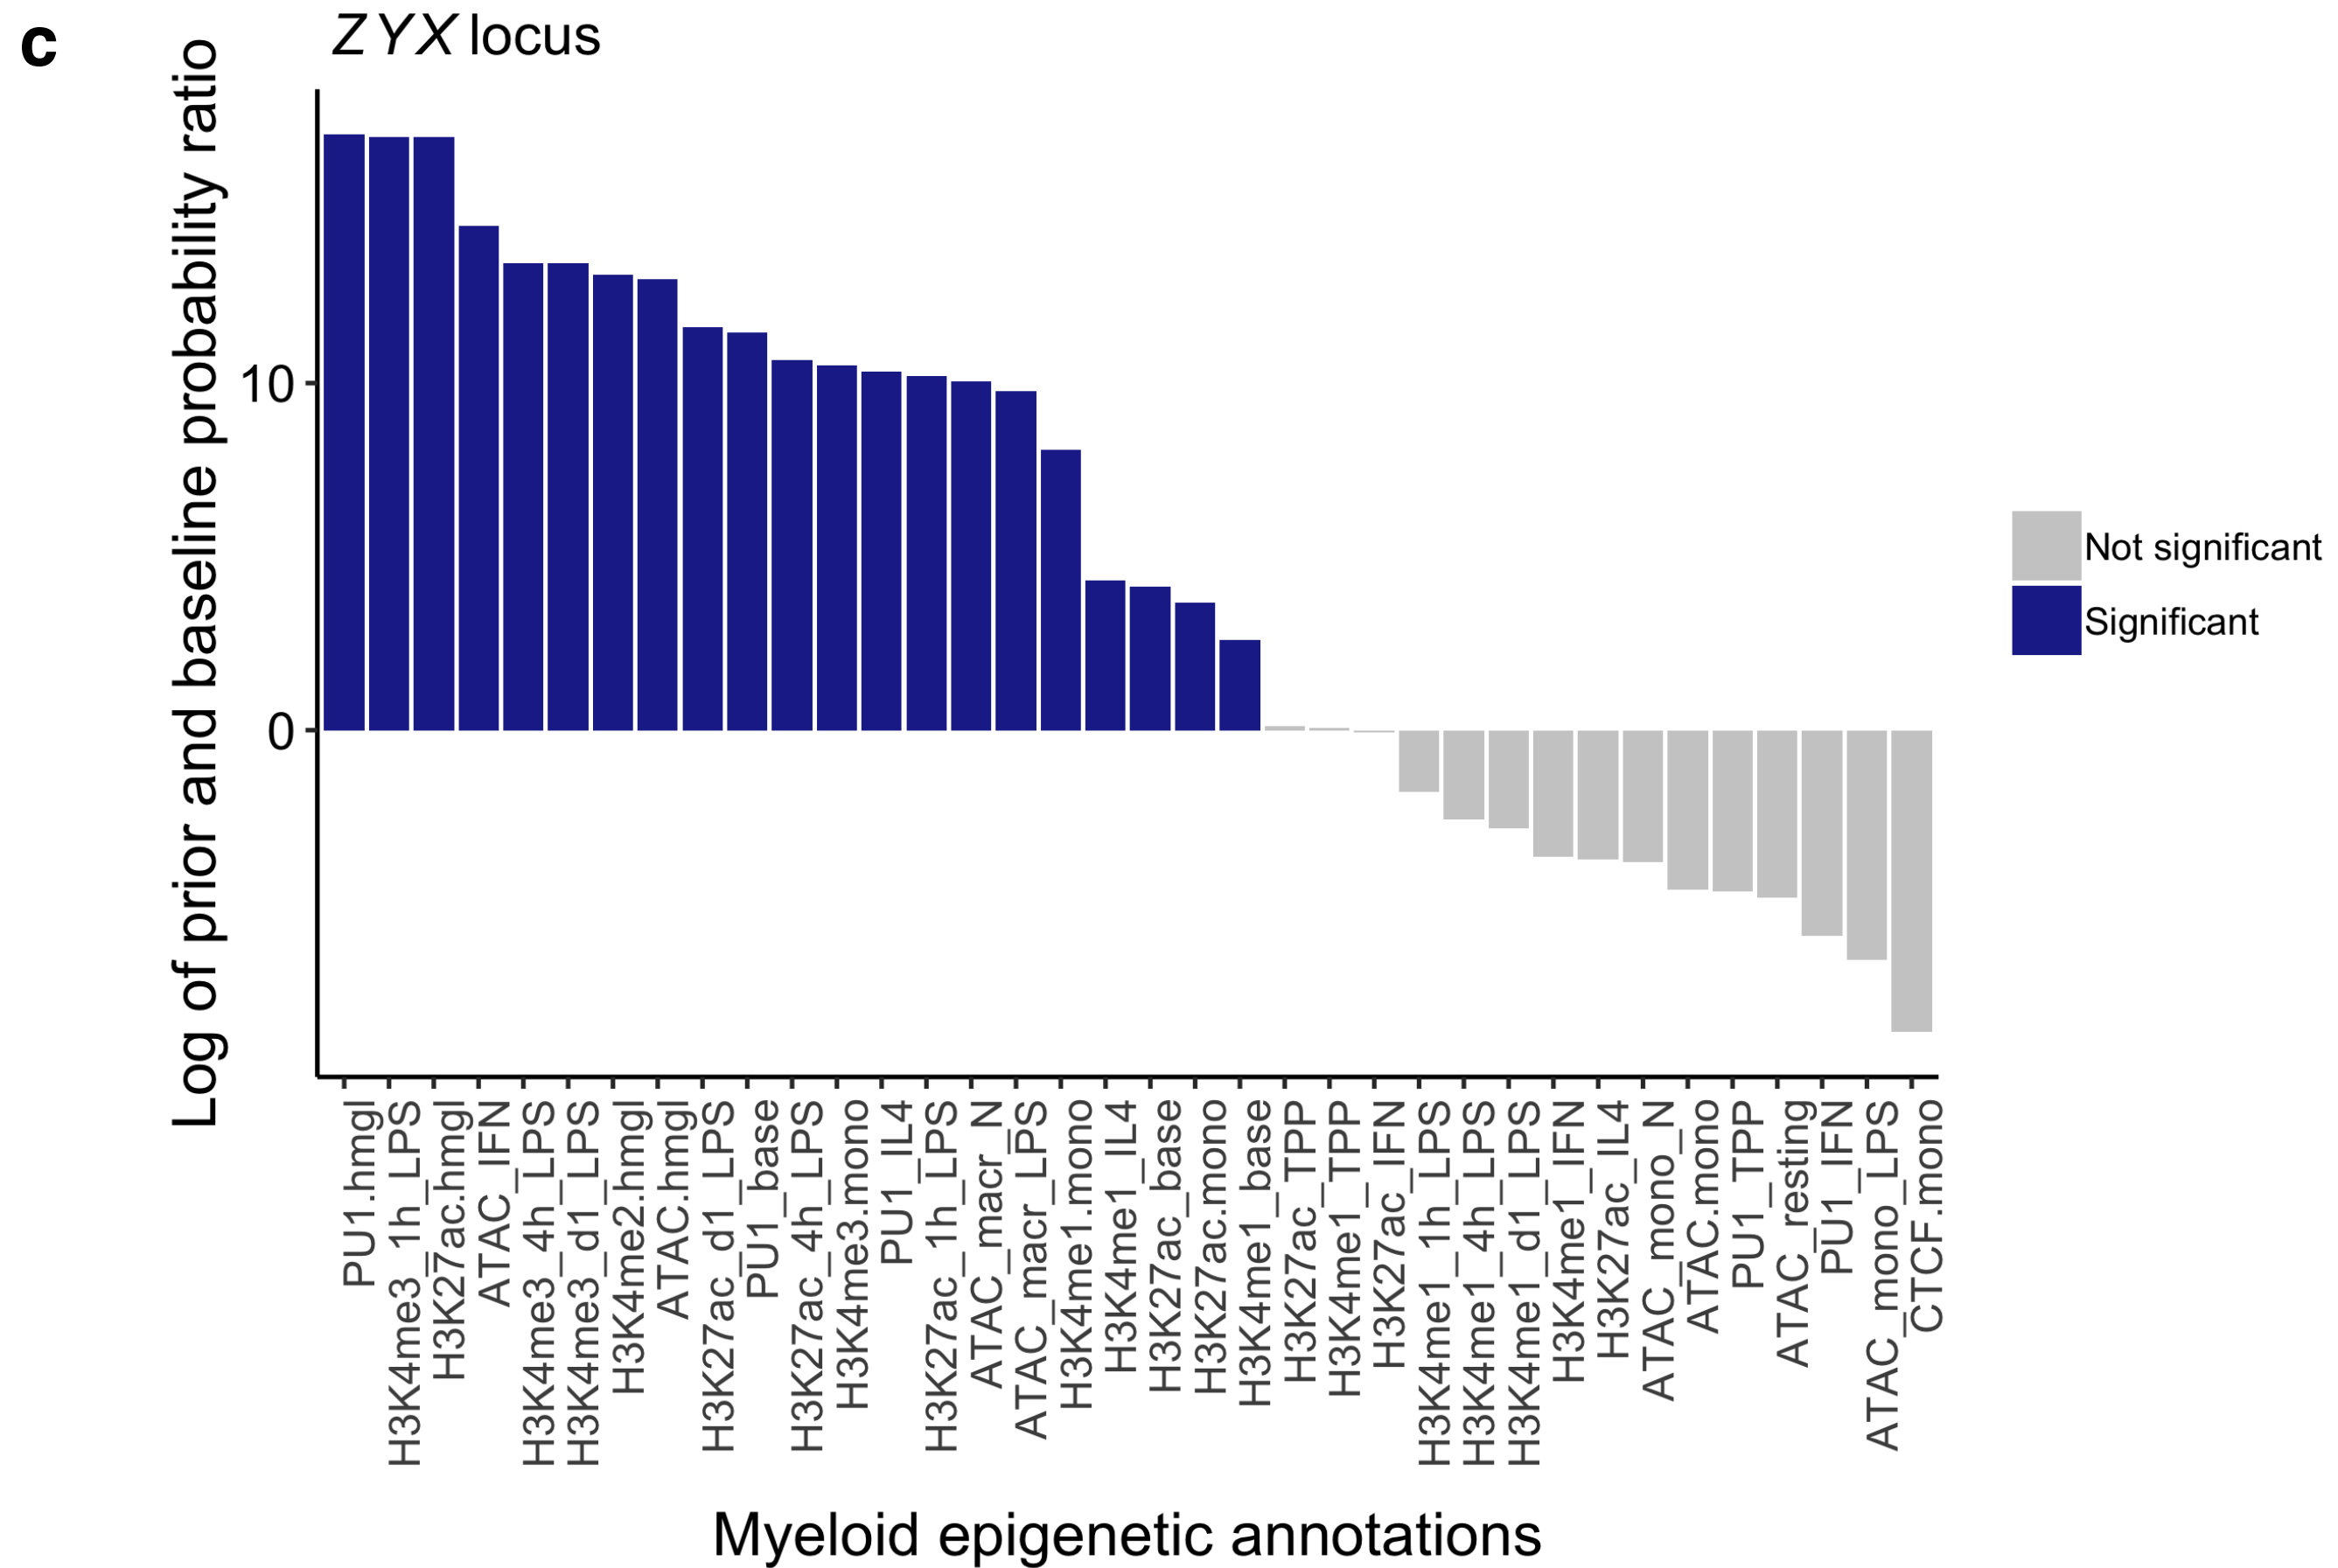



# Supplementary Figure 4

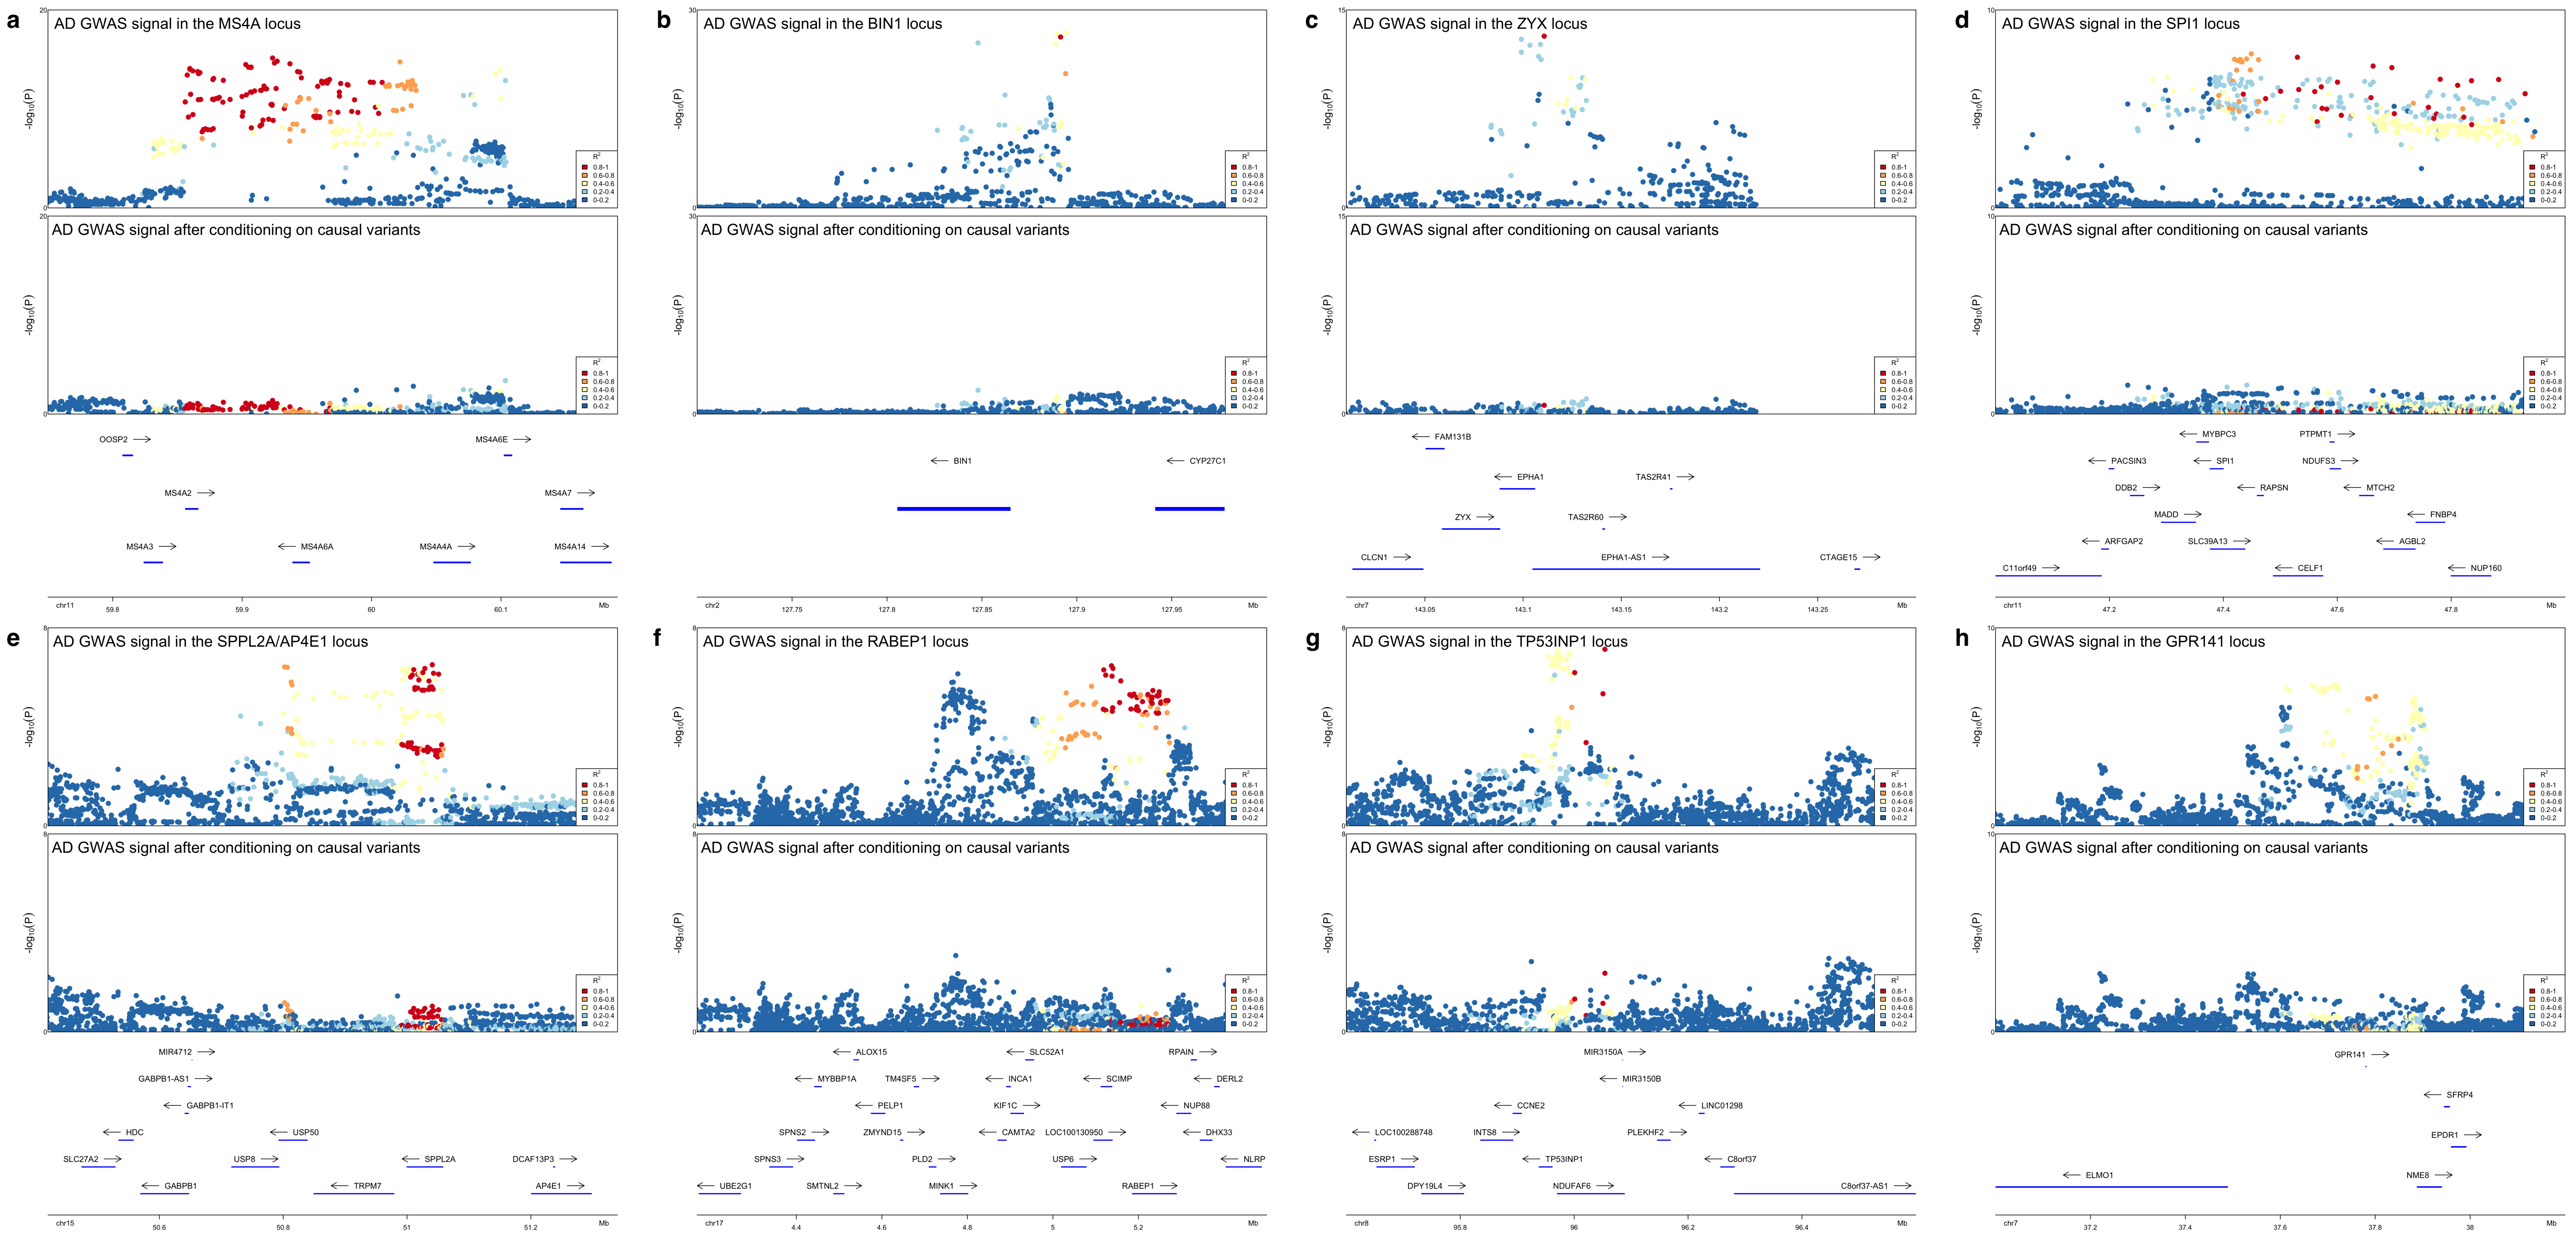

Supplement: Supplementary file [file media-1.pdf]
